# Supplementary material
Source: Springer Nature journal article supplement (https://www.springermedizin.de/resource/supplementary/12908_2009_87_MOESM2_ESM.pdf/9525110)

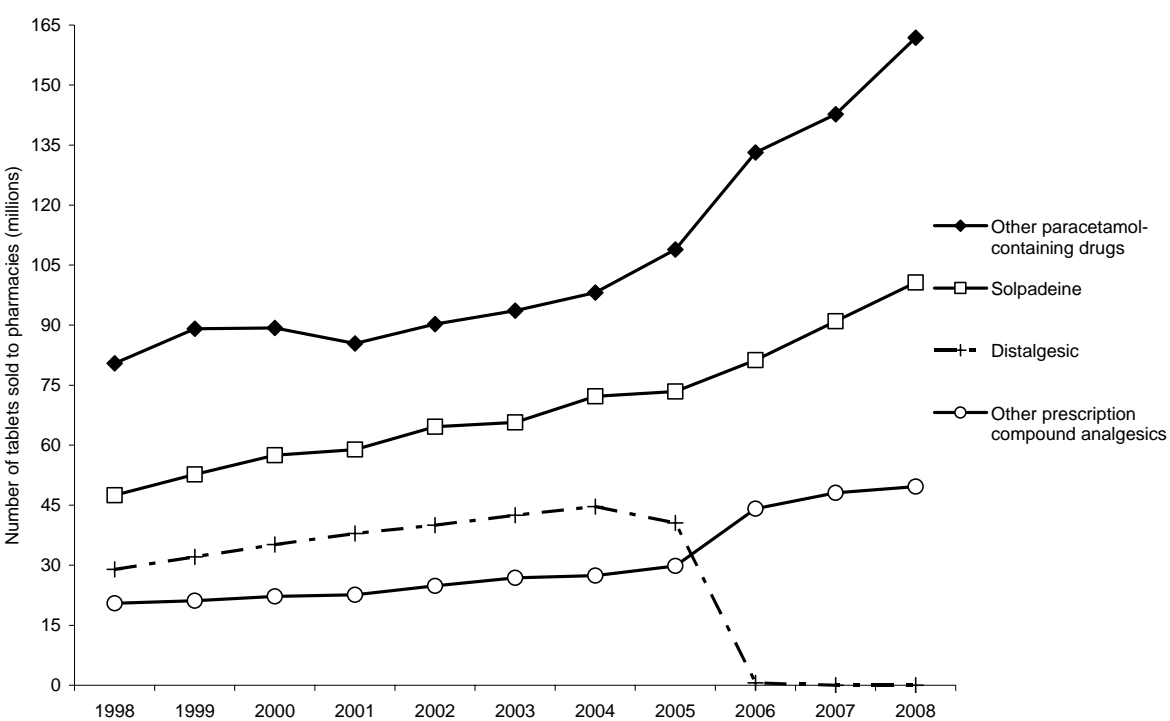

Supplement: MOESM2 [file 9525110]
